# 1 The Post-2020 Global Biodiversity Framework must safeguard 2 the Tree of Life

3 Rikki Gumbs<sup>1,2\*</sup>, Abhishek Chaudhary<sup>3</sup>, Barnabas H. Daru<sup>4</sup>, Daniel P. Faith<sup>5</sup>, Félix Forest<sup>6</sup>, Claudia L.  
4 Gray<sup>1</sup>, Aida Kowalska<sup>7</sup>, Who-Seung Lee<sup>8</sup>, Roseli Pellens<sup>9</sup>, Laura J. Pollock<sup>10</sup>, James Rosindell<sup>2</sup>, Rosa A.  
5 Scherson<sup>11</sup>, Nisha R. Owen<sup>7</sup>

- 6 1. EDGE of Existence programme, Zoological Society of London, London, NW1 4RY, United Kingdom  
7 2. Imperial College London, Silwood Park Campus, Buckhurst Road, Ascot, Berkshire, SL5 7PY, United Kingdom  
8 3. Department of Civil Engineering, Indian Institute of Technology (IIT) Kanpur, 208016 Kanpur, India  
9 4. Department of Life Sciences, Texas A&M University-Corpus Christi, Corpus Christi, Texas, 78412, USA  
10 5. The Australian Museum Research Institute, The Australian Museum, Sydney 2010, Australia  
11 6. Jodrell Laboratory, Royal Botanic Gardens, Kew, Richmond, Surrey, TW9 3DS, United Kingdom  
12 7. On the EDGE Conservation, 152a Walton Street, Chelsea, SW3 2JJ  
13 8. Environmental Assessment Group, Korea Environment Institute, Sejong, 30147, Republic of Korea  
14 9. Institut de Systématique, Evolution, et Biodiversité (Muséum national d'Histoire naturelle, Centre National  
15 pour la Recherche Scientifique, Sorbonne Université, Ecole Pratique de Hautes Etudes, Université des  
16 Antilles) CP 50, 45 rue Buffon - 75005 Paris, France  
17 10. Department of Biology. McGill University. Montréal, Québec, H3A 1B1, Canada  
18 11. Departamento de Silvicultura y Conservación de la Naturaleza, Universidad de Chile., PO Box 9206,  
19 Santiago, Chile

20 **Short running title:** "Post-2020 and the Tree of Life"

21 **Keywords:** Biodiversity, Biodiversity Indicators, Convention on Biological Diversity, EDGE species,  
22 Evolutionarily Distinct and Globally Endangered, Nature's Contributions to People, Phylogenetic  
23 Diversity, Post-2020 Global Biodiversity Framework

24 **Total word count:** 2993

25 **\*Corresponding author details:**

26 Rikki.gumbs@zsl.org

27 **Abstract**

28 Following our failure to fully achieve any of the 20 Aichi biodiversity targets, the future of biodiversity  
29 rests in the balance. The Convention on Biological Diversity's Post-2020 Global Biodiversity  
30 Framework (GBF) presents us with the opportunity to preserve Nature's Contributions to People  
31 (NCPs) for current and future generations through conserving biodiversity and averting extinction  
32 across the Tree of Life. Here we demonstrate that species extinctions can lead to unequal losses of  
33 biodiversity depending on their evolutionary history, and call attention to our need to conserve the  
34 Tree of Life to maintain its benefits. We highlight two indicators available for adoption in the post-  
35 2020 GBF to monitor our progress towards safeguarding the Tree of Life. The Phylogenetic Diversity  
36 indicator, adopted by IPBES, can be used to monitor biodiversity's capacity to maintain NCPs. The  
37 EDGE (Evolutionarily Distinct and Globally Endangered) Index monitors how well we are performing at  
38 averting the greatest losses across the Tree of Life by conserving the most distinctive species. By  
39 committing to safeguarding the Tree of Life post-2020, we can reduce biodiversity loss and preserve  
40 nature's contributions to humanity now and into the future.

41

42

## 43 1 Introduction

44 Current biodiversity policy has failed to stem declines across the board (Díaz et al. 2019), partially  
45 achieving only six of the 20 Aichi biodiversity targets (Secretariat of the Convention on Biological  
46 Diversity 2020a). As nations now work towards agreeing the post-2020 Global Biodiversity Framework  
47 (GBF) for the Convention on Biological Diversity (CBD), and its goals and targets for the coming  
48 decades, it is only by being highly ambitious that we can have any chance of improving the outlook for  
49 global biodiversity by 2050 (Díaz et al. 2020). At the heart of the post-2020 GBF (Secretariat of the  
50 Convention on Biological Diversity 2020b) is the recognition that we must value and maintain nature's  
51 contributions to people— all the benefits and impacts on people that come from nature both now  
52 and in the future (IPBES 2019), realised through conservation and sustainable use (draft Goal B), and  
53 achieved by protecting ecosystems and species (draft Goal A).

54 A critical and often overlooked aspect of biodiversity is the evolutionary heritage represented by a set  
55 of species across the Tree of Life, measured by Phylogenetic Diversity (PD; Faith 1992). PD represents  
56 the variety of different evolutionary features of species that give rise to both current benefits and as  
57 yet unexplored options for humanity, which we can effectively safeguard by preserving the Tree of  
58 Life (Forest et al. 2007; IPBES 2019b; Molina-Venegas et al. 2020). Maintaining possible future uses  
59 and benefits to society (the biodiversity option value measured by PD; Faith et al. 2018) is particularly  
60 important in the context of a changing environment and the challenges that biodiversity—and its  
61 contributions to humanity—faces going forward (IPBES 2019b).

62 The Intergovernmental Science-Policy Platform on Biodiversity and Ecosystem Services (IPBES)  
63 adopted PD as an indicator for Nature's Contributions to People (NCPs; Faith et al. 2018; IPBES  
64 2019b): linking PD to the maintenance of options (the overall capacity of biodiversity to support a  
65 good quality of life into the future; NCP 18), and thus the continued provision of medicinal,  
66 biochemical and genetic resources (NCP 14), and learning and inspiration (NCP 15; Díaz et al. 2019;  
67 IPBES 2019b). This recognition of the link between the Tree of Life and nature's contributions to  
68 people provides an opportunity to address the significant challenge of maintaining these for current  
69 and future generations, to which the CBD is committed (Secretariat of the Convention on Biological  
70 Diversity 2021a). Indeed, Díaz et al. (2020) recognise that, if we wish to 'bend the curve' of  
71 biodiversity loss whilst securing a broad range of NCPs, we must set and attain highly ambitious goals  
72 that include prioritising the conservation of evolutionarily distinct lineages to effectively safeguard the  
73 Tree of Life.

74 Here we show that, when setting goals and targets linked to the maintenance of biodiversity and the  
75 associated contributions to people, focusing on species without considering their evolutionary history

76 may lead to large biodiversity losses across the Tree of Life. However, much of this impending loss of  
77 PD could be averted by prioritising a small proportion of species for conservation. We outline the use  
78 of two related indicators suitable for the post-2020 GBF that uniquely interlink valuing nature's  
79 contributions to people (Goal B) with improving species' conservation status (Goal A) (Secretariat of  
80 the Convention on Biological Diversity 2020b): (i) the Phylogenetic Diversity indicator monitoring the  
81 status of PD and thus biodiversity's capacity to maintain contributions to people (adopted by IPBES);  
82 (ii) the EDGE (Evolutionarily Distinct and Globally Endangered) Index tracking the extinction risk of the  
83 world's most evolutionarily distinct and threatened species. Aside from these, no indicators currently  
84 listed in the draft monitoring framework capture these important aspects of biodiversity as values to  
85 conserve, nor explicitly articulate how biodiversity and nature's contributions to people are  
86 inextricably linked.

87

## 88 **2 Not all extinctions are equal**

89 The extinction of a species represents the loss of the distinct features it embodied, the product of  
90 millions of years of evolutionary history, and results in a measurable reduction in global biodiversity,  
91 hence preventing extinction is fundamental to conservation (Díaz et al. 2020; Rounsevell et al. 2020).  
92 Preventing extinction is integral to draft Goal A in the GBF but, when considering each extinction  
93 event as of equal concern, we assume that each species contributes equally to the variety of life. This  
94 overlooks the importance of the variety of distinct features associated with differing evolutionary  
95 histories, also lost as part of a species' extinction. Thus, the extinction of a species that shares much  
96 of its evolutionary history and features with numerous extant close relatives intuitively represents a  
97 lesser reduction in global biodiversity (for as long as those close relatives survive), in comparison to  
98 the extinction of a species with few or no close relatives on the Tree of Life (Isaac et al. 2007; Díaz et  
99 al. 2020).

100 Phylogenetic Diversity approximates the features shared by, and unique to, species by measuring the  
101 branches of the Tree of Life that connect them: the greater the loss of PD, and therefore evolutionary  
102 history, the more distinct features we may lose (Faith 1992; Forest et al. 2007; Molina-Venegas et al.  
103 2020). By measuring the reduction in PD associated with extinctions, we can estimate the reduction in  
104 biodiversity linked to the loss of features shaped by evolutionary history.

105 The extinction of 84 mammal species since 1500 (IUCN 2020) has resulted in the loss of around 250  
106 million years of PD (0.7% of the mammal Tree of Life; Figure 1). If we were to lose all 1,244 currently  
107 threatened species (VU-CR on the IUCN Red List), we stand to lose around 4.5 billion years (11.9%) of

108 the mammal Tree of Life (red line, Figure 1; Supporting Methods). Conservation efforts aim to avert  
109 the extinction of those species that are threatened, and thus the strategies adopted to prioritise  
110 species for conservation given our limited resources, will therefore also have a significant impact on  
111 the magnitude of biodiversity loss correspondingly averted. Given the scale of biodiversity loss that  
112 we face, it is clearly not enough to simply seek to prevent extinctions, we must seek to avert the  
113 extinction of species that will result in the greatest losses of PD and thus biodiversity.

114 Exploring the implications of different conservation strategies on the mammal Tree of Life, we show  
115 that conserving random sets of threatened mammals can save some threatened PD, but modelling a  
116 theoretical ideal selection that prioritises an equal number of threatened species that maximise PD  
117 can actually reduce this loss by as much as 65.6% (Figure 1; Table S1). As conservation in practice  
118 does not choose species to conserve based on a given sample size, we modelled the main PD-  
119 informed species conservation strategy in use globally, conserving Evolutionarily Distinct and Globally  
120 Endangered (EDGE) species (Box 1). This approach conserves greater amounts of PD than random sets  
121 of threatened species under all scenarios (from 26.2% increase in PD conserved under the most  
122 extreme extinction scenario (CR-VU) to 109.9% increase when only Critically Endangered species were  
123 considered at risk; ‘High EDGE’ strategy, Figure 1; Table S2).

#### **BOX 1: Conserving evolutionarily distinct species**

In 2012, the International Union for the Conservation of Nature (IUCN) adopted a resolution that recognised the importance of conserving threatened evolutionarily distinct lineages, the extinction of which results in the irreversible loss of irreplaceable genes and characteristics (IUCN 2012). Díaz et al. (2020) echo this resolution in their assertion that any truly ambitious post-2020 targets must aim to conserve distinct species in order to maintain the Tree of Life and the benefits to humanity it bestows. These values are embodied by the ‘EDGE’ (Evolutionarily Distinct and Globally Endangered) approach, which combines evolutionary distinctiveness with extinction risk to prioritise threatened species whose extinction would lead to the highest losses across the Tree of Life (Isaac et al. 2007; see Supporting Methods). To date, the EDGE approach continues to be the most established and best-known PD-informed conservation strategy (Owen et al. 2019), and has been applied to numerous animal and plant groups (e.g. Forest et al. 2018; Gumbs et al. 2018; Daru et al. 2019). By conserving high-ranking EDGE species, we can avert much of the impending losses across the Tree of Life (Figure 1, Figure S1), and we can track trends in the conservation status of priority EDGE species using simple metrics (Figure 3).

124

125 Modelling a scenario where PD is ignored demonstrates that there are sets of threatened species that  
126 can be prioritised for conservation that conserve even less of the Tree of Life than even random  
127 strategies (‘Low EDGE’, Figure 1). Hence, when the number of species extinctions remains constant,  
128 such as in each extinction scenario here (Figure 1; Supporting Methods), the associated PD loss

129 demonstrates the scale of potential variation in the magnitude of biodiversity loss depending on  
 130 those species selected for conservation. Thus, by failing to consider PD in conservation strategies we  
 131 run the risk of losing distinct species that embody particularly large amounts of irreplaceable  
 132 biodiversity (Chaudhary et al. 2018).



133

134 **Figure 1:** Variation in magnitude of expected loss of Phylogenetic Diversity (PD) under different  
 135 conservation strategies selecting subsets of species, across four extinction scenarios for the world's  
 136 mammals: 'PE': only Possibly Extinct and Extinct species on the IUCN Red List are lost; 'CR': Critically  
 137 Endangered species are also lost; 'CR-EN': all Endangered species are also lost; 'CR-VU': all Vulnerable  
 138 species are also lost. Coloured lines represent median values of PD lost under each of the five  
 139 conservation strategies across each extinction scenario. "No conservation" = no species are conserved  
 140 under each extinction scenario; "low 'EDGE'" = species in lowest quartile of expected PD loss  
 141 contributions are conserved [low-ranking 'EDGE' Species] as a non-PD informed conservation model;  
 142 "random" = a random set of species from those that meet the extinction scenario criteria, equal in size  
 143 to one quartile, is conserved as our null model; "high 'EDGE'" = species in uppermost quartile of  
 144 expected PD loss contributions are conserved [high-ranking 'EDGE' Species] as a PD-informed  
 145 conservation model; "PD maximisation" = the theoretical ideal selection of species that optimise PD is  
 146 conserved. PD loss was calculated across 100 mammalian trees - see Supporting Methods for details.

147

### 148 3 Tracking and averting phylogenetic diversity loss through time

#### 149 i. Phylogenetic Diversity indicator

150 Goal B of the draft GBF aims to ensure that the benefits to all people provided by biodiversity (NCPs)  
151 are maintained or enhanced, with an explicit commitment to intergenerational equity – i.e. preserving  
152 the interests of future generations (Secretariat of the Convention on Biological Diversity 2020b). To  
153 achieve this, we need tools with which to monitor biodiversity’s capacity to maintain NCPs. By  
154 preserving the Tree of Life we can capture both current benefits and future options (Forest et al.  
155 2007; IPBES 2019b; Molina-Venegas et al. 2020), therefore monitoring the status of the Tree of Life is  
156 crucial to reliably quantify the capacity for biodiversity to provide NCPs through time (IPBES 2019b).

157 We can monitor the status of the Tree of Life by calculating the expected loss of PD as the amount of  
158 evolutionary history expected to be lost given current extinction risks to species (Faith et al. 2018).  
159 Specifically, the greater the proportion of long branches of the Tree of Life supported by threatened  
160 species—or groups of closely-related threatened species (e.g., pangolins, of which all eight species are  
161 threatened with extinction)—the greater the expected loss of PD. This approach underpins the PD  
162 indicator adopted by IPBES to monitor trends in NCPs (Faith et al. 2018), particularly the maintenance  
163 of options (Díaz et al. 2019). Initial approximations of the magnitude of expected loss of PD have been  
164 reported for several taxonomic groups in regional and global IPBES assessments (IPBES 2018, 2019b;  
165 Martín-López et al. 2018).

166 Our proposed use of the existing PD indicator used by IPBES incorporates an update to improve its  
167 accuracy and applicability for the post-2020 Global Biodiversity Framework and beyond. Specifically,  
168 this update incorporates the standardised extinction risk of all species in a given taxonomic group, for  
169 multiple time points where applicable (Henriques et al. 2020; IUCN 2020), to generate trends in  
170 expected PD loss. We apply this updated approach to three clades: mammals, birds and cycads  
171 (Supporting Methods). Given increased levels of extinction risk through time for each of the three  
172 groups, trends in their PD are worsening (Figure 2).



173

174 **Figure 2:** The PD indicator: tracking PD loss through time. Left panel: trends in percentage of expected  
 175 PD loss for the world's mammals (blue), birds (green) and cycads (pink), based on current and  
 176 historical IUCN Red List assessments; right panel: detail of this change, baseline (left circle) and latest  
 177 (right circle) estimations of expected PD loss for each clade, with the percent change in overall  
 178 expected PD loss. \*The 2020 timepoints displayed are not official Red List Index (RLI) timepoints of  
 179 comprehensive assessments for all mammals and birds but represent the latest status of these  
 180 assessments for both clades (see Supporting Methods); the trendlines from official RLI data to these  
 181 2020 timepoints are therefore dashed. The shaded regions around each trend line represent the range  
 182 of values. There are insufficient repeated Red List assessments to produce a 2020 timepoint for cycads.

183

184 Considering Phylogenetic Diversity's link to the provision of current and future benefits (Forest et al.  
 185 2007; IPBES 2019b; Molina-Venegas et al. 2020), and its adoption by IPBES to indicate the capacity of  
 186 biodiversity to keep options open (Faith et al. 2018; Díaz et al. 2019; IPBES 2019a), it provides a  
 187 unique and versatile tool with which to monitor NCPs while maintaining intergenerational equity. The  
 188 PD indicator is therefore relevant to all aspects of Goal B of the draft GBF that relate benefits for  
 189 people to biodiversity (Secretariat of the Convention on Biological Diversity 2020b, 2021a). The PD  
 190 indicator is currently listed as a proposed complementary indicator for Goal B in the draft monitoring  
 191 framework for the GBF (Secretariat of the Convention on Biological Diversity 2020c), however, it is  
 192 demonstrably suitable as a headline or component indicator, for which it meets the criteria for global  
 193 and national reporting (IPBES 2019b; Secretariat of the Convention on Biological Diversity 2021b).

194

195

196 ii. EDGE Index

197 To improve the status of the Tree of Life, we must improve the conservation status of threatened  
198 species whilst preventing the worsening of conservation status for non-threatened species, with a  
199 particular focus on distinctive species that embody a disproportionate amount of threatened PD. The  
200 loss of highly evolutionarily distinctive species, with few close relatives on the Tree of Life, results in  
201 the irreversible loss of not only their characteristics but also their potential benefits and should be  
202 avoided (Díaz et al. 2020). Without this recognition under draft Goal A on species, there is a significant  
203 risk that distinctive and threatened species will continue to be overlooked by conservation efforts  
204 (Owen et al. 2019), representing a significant potential loss of PD and consequently the reduction in  
205 options for humanity.

206 An established tool for identifying evolutionarily distinctive species whose conservation should be  
207 prioritised is the EDGE approach (Box 1), which prioritises the Tree of Life more effectively than  
208 alternative approaches (Figure S3; Supporting Methods). Using existing methods (Isaac et al. 2007;  
209 Faith et al. 2018), we present a simple EDGE indicator with several components to track trends in the  
210 extinction risk of priority EDGE species and thus monitor how well conservation efforts are  
211 performing at preventing the pruning of deep and long branches of the Tree of Life. We compiled the  
212 number of priority EDGE species (see Supporting Methods), their associated expected loss of PD, and  
213 trends in their global extinction risk through time for birds, mammals and cycads (Figure 3).

214 The EDGE index has multiple components, as follows (and see Supporting Methods):

- 215 a. i. Changes in the number of EDGE species, increasing as more highly distinctive species become  
216 threatened, or decreasing as highly distinctive species move into non-threatened Red List categories;
- 217 a. ii. Changes in the amount of associated expected PD loss according to EDGE species conservation  
218 status, indicating the effectiveness of conservation efforts in averting the greatest losses of PD;
- 219 a. iii. Number of EDGE species that have gone extinct;
- 220 b. Changes in the conservation status of EDGE species, transitions to worse Red List categories  
221 ('uplistings') indicate insufficient conservation efforts for the most distinctive and threatened species,  
222 whereas transitions to less severe Red List categories ('downlistings') indicates effective conservation  
223 efforts.



224

225 **Figure 3:** The EDGE Index: monitoring trends in extinction risk for priority EDGE Species. Left panels:  
 226 tracking changes through time in the total number of EDGE species, associated expected PD loss (ePD  
 227 loss), and extinctions (EX Species), of priority EDGE Species per clade; and (right panels) the changes in  
 228 extinction risk (uplistings and downlistings: species moving into higher or lower Red List categories)  
 229 within sets of EDGE Species, for: a-b) mammals, c-d) birds, and e-f) cycads. Changes in total number of

230 *EDGE species, associated expected PD loss, and extinct species, are cumulative from baseline*  
231 *timepoint (dotted line). Number of uplistings and downlistings is for each time period between time*  
232 *points.*

233

234 This indicator complements existing broader species measures, meeting the need to prioritise  
235 evolutionarily distinct species to conserve the Tree of Life as part of any efforts to reduce extinction  
236 rate and risk (Secretariat of the Convention on Biological Diversity 2021b, 2021a), making it relevant  
237 to the preventing extinctions component of draft Goal A and any proposed improvements (Williams  
238 et al. 2020).

239

240       iii. National contributions to global biodiversity goals

241 Given the impetus—and desire—for nations to quantify their own values and monitor their individual  
242 progress towards both national and global targets (Rounsevell et al. 2020), it is essential that  
243 biodiversity indicators adopted in the post-2020 framework can be disaggregated to regional and  
244 national levels. In fact, the capability to monitor the status of global values of biodiversity at a national  
245 level is particularly important given that current local-scale conservation efforts can often neglect  
246 these species (Owen et al. 2019). Indeed, the benefits to humanity bestowed by species of medicinal  
247 importance, or those species that inspire awe for the natural world, transcend both political borders  
248 and generations. The indicators proposed here can be effectively disaggregated to national levels. To  
249 illustrate the simplicity of this, we generated the expected PD loss indicator and EDGE Index (all  
250 components) for the birds of Kenya (Figure 4; see Supporting Methods), just one example of a  
251 biodiverse country.

252

### National-level indicators for conserving the Tree of Life: Birds of Kenya



253

254 **Figure 4:** Example of national disaggregations for the two indicators for the birds of Kenya. The  
 255 expected PD loss of Kenyan bird species (a) is calculated as a percentage of the total PD associated  
 256 with bird species present in Kenya. The EDGE Index for Kenyan birds (b-c) is subset from the global pool  
 257 of priority EDGE birds to ensure national priority species align with those of global value. See  
 258 Supporting Methods for methods underpinning this national disaggregation approach.

259

#### 260 4 Conclusions

261 Here we have demonstrated how conservation strategies that do not incorporate evolutionary history  
 262 will inevitably fail to avert the greatest losses of irreplaceable biodiversity (Figure 1, S1), and we have  
 263 highlighted two indicators that can be used to track and prioritise conservation efforts to prevent  
 264 these losses within the post-2020 Global Biodiversity Framework. These indicators present a unique

265 opportunity to incorporate the Tree of Life—and the benefits it provides—into global biodiversity  
266 policy, while complementing existing species measures.

267 The PD indicator, adopted by IPBES (Díaz et al. 2019), is unique in its capacity to link the preservation  
268 of biodiversity to the maintenance of nature’s contributions to people, bolstering intergenerational  
269 equity. The EDGE Index and its components utilise the well-established EDGE approach to monitor the  
270 conservation status of the world’s most evolutionarily distinct species, the conservation of which  
271 must underpin any ambitious post-2020 framework (Díaz et al. 2020). Despite continued advances in  
272 our capability to map extinction risk across the Tree of Life (ter Steege et al. 2015; Jin & Qian 2019),  
273 more resources are needed to ensure any global biodiversity indicators are applicable to more than a  
274 narrow set of well-studied species groups, and regularly compiled to allow an effective monitoring of  
275 the current state of biodiversity. Baselines of these indicators are in production for terrestrial and  
276 marine vertebrates, gymnosperms and corals, and under the Global Strategy for Plant Conservation  
277 the required data will soon be available for all vascular plants, aiding their inclusion (Borsch et al.  
278 2020). The IUCN SSC Phylogenetic Diversity Task Force has committed to generating the two  
279 indicators outlined here at global and national levels on a regular basis (Owen et al. 2020), which can  
280 effectively assist nations in tracking and reporting progress towards the goals of the post-2020 Global  
281 Biodiversity Framework.

282 To be truly ambitious, the post-2020 global biodiversity framework must aim to safeguard the Tree of  
283 Life (Díaz et al. 2020). If we fail to do so, we risk great losses of evolutionary history including the loss  
284 of their associated options and benefits for current and future generations. But if we succeed, we can  
285 preserve much of the global value of nature’s contributions to humanity now and into the future.

286

## 287 **References**

- 288 Borsch, T., Berendsohn, W., Dalcin, E., Delmas, M., Demissew, S., Elliott, A., ... Zamora, N. (2020).  
289 World Flora Online: Placing taxonomists at the heart of a definitive and comprehensive global  
290 resource on the world’s plants. *Taxon*, 69, 1311–1341.
- 291 Chaudhary, A., Pourfaraj, V. & Mooers, A.O. (2018). Projecting global land use-driven evolutionary  
292 history loss. *Divers. Distrib.*, 24, 158–167.
- 293 Daru, B.H., le Roux, P.C., Gopalraj, J., Park, D.S., Holt, B.G. & Greve, M. (2019). Spatial overlaps  
294 between the global protected areas network and terrestrial hotspots of evolutionary diversity.  
295 *Glob. Ecol. Biogeogr.*, 28, 757–766.
- 296 Díaz, S., Settele, J., Brondízio, E.S., Ngo, H.T., Agard, J., Arneth, A., ... Zayas, C.N. (2019). Pervasive

- 297 human-driven decline of life on Earth points to the need for transformative change. *Science* (80-  
298 ), 366, eaax3100.
- 299 Díaz, S., Zafra-Calvo, N., Purvis, A., Verburg, P.H., Obura, D., Leadley, P., ... Zanne, A.E. (2020). Set  
300 ambitious goals for biodiversity and sustainability. *Science* (80- ), 370, 411–413.
- 301 Faith, D.P. (1992). Conservation evaluation and phylogenetic diversity. *Biol. Conserv.*, 61, 1–10.
- 302 Faith, D.P. (2019). EDGE of existence and phylogenetic diversity. *Anim. Conserv.*, 22, 537–538.
- 303 Faith, D.P., Veron, S., Pavoine, S. & Pellens, R. (2018). Indicators for the Expected Loss of Phylogenetic  
304 Diversity. In: *Phylogenetic Divers. Appl. Challenges Biodivers. Sci.* (eds. Scherson, R.A. & Faith,  
305 D.P.). Springer International Publishing, Cham, pp. 73–91.
- 306 Forest, F., Grenyer, R., Rouget, M., Davies, T.J., Cowling, R.M., Faith, D.P., ... Savolainen, V. (2007).  
307 Preserving the evolutionary potential of floras in biodiversity hotspots. *Nature*, 445, 757–760.
- 308 Forest, F., Moat, J., Baloch, E., Brummitt, N.A., Bachman, S.P., Ickert-Bond, S., ... Buerki, S. (2018).  
309 Gymnosperms on the EDGE. *Sci. Rep.*, 8, 6053.
- 310 Gumbs, R., Gray, C.L., Wearn, O.R. & Owen, N.R. (2018). Tetrapods on the EDGE: Overcoming data  
311 limitations to identify phylogenetic conservation priorities. *PLoS One*, 13, e0194680.
- 312 Henriques, S., Böhm, M., Collen, B., Luedtke, J., Hoffmann, M., Hilton-Taylor, C., ... Freeman, R. (2020).  
313 Accelerating the monitoring of global biodiversity: Revisiting the sampled approach to  
314 generating Red List Indices. *Conserv. Lett.*, 13, e12703.
- 315 IPBES. (2018). *The IPBES regional assessment report on biodiversity and ecosystem services for Asia  
316 and the Pacific*. Karki, M., Senaratna Sellamuttu, S., Okayasu, S., and Suzuki, W. (eds). Bonn,  
317 Germany.
- 318 IPBES. (2019a). Summary for policymakers of the global assessment report on biodiversity and  
319 ecosystem services of the Intergovernmental Science-Policy Platform on Biodiversity and  
320 Ecosystem Services. In: (eds. Díaz, S., Settele, J., Brondízio, E.S., Ngo, H.T., Guèze, M., Agard, J., ...  
321 Zayas, C.N.). Bonn, Germany, p. 56.
- 322 IPBES. (2019b). *Global assessment report on biodiversity and ecosystem services of the  
323 Intergovernmental Science-Policy Platform on Biodiversity and Ecosystem Services*. IPBES  
324 secretariat, Bonn, Germany.
- 325 Isaac, N.J.B., Turvey, S.T., Collen, B., Waterman, C. & Baillie, J.E.M. (2007). Mammals on the EDGE:  
326 Conservation priorities based on threat and phylogeny. *PLoS One*, 2, e296.

- 327 IUCN. (2012). *Resolutions and Recommendations*. IUCN, Gland, Switzerland.
- 328 IUCN. (2020). IUCN Red List of Threatened Species. Version 2020-1 [WWW Document]. URL  
329 [www.iucnredlist.org](http://www.iucnredlist.org)
- 330 Jin, Y. & Qian, H. (2019). V.PhyloMaker: an R package that can generate very large phylogenies for  
331 vascular plants. *Ecography*, 42, 1353–1359.
- 332 Martín-López, B., Church, A., Başak Dessane, E., Berry, P., Chenu, C., Christie, M., ... Van Oudenhoven,  
333 E., A.P. (2018). Chapter 2: Nature's contributions to people and quality of life. In: *IPBES Reg.*  
334 *Assess. Rep. Biodivers. Ecosyst. Serv. Eur. Cent. Asia* (eds. Rounsevell, M., Fischer, M., Torre-  
335 Marin Rando, A. & Mader, A.). Secretariat of the Intergovernmental Science-Policy Platform on  
336 Biodiversity and Ecosystem Services, Bonn, Germany, pp. 57–185.
- 337 Molina-Venegas, R., Rodriguez, M., Pardo-de-Santayana, M., Ronquillo, C. & Mabberley, D. (2020).  
338 Evolutionary history is a powerful means to evince significant levels of plant services for  
339 humankind. PREPRINT: Research Square [WWW Document]. URL  
340 <https://doi.org/10.21203/rs.3.rs-121288/v1>
- 341 Owen, N.R., Chaudhary, A., Daru, B.H., Gray, C.L., Forest, F., Gumbs, R., ... Faith, D.P. (2020).  
342 Conservation of evolutionary heritage supports the transformative change required for the CBD  
343 post2020 Framework: proposed phylogenetic diversity indicators as a contribution from non-  
344 state actors [WWW Document]. *Submiss. from IUCN SSC Phylogenetic Divers. Task Force*. URL  
345 [https://www.cbd.int/api/v2013/documents/6445B22E-1BA7-18B7-6D28-  
346 61A95052E841/attachments/IUCN-6.docx](https://www.cbd.int/api/v2013/documents/6445B22E-1BA7-18B7-6D28-61A95052E841/attachments/IUCN-6.docx)
- 347 Owen, N.R., Gumbs, R., Gray, C.L. & Faith, D.P. (2019). Global conservation of phylogenetic diversity  
348 captures more than just functional diversity. *Nat. Commun.*, 10, 859.
- 349 Rounsevell, M.D.A., Harfoot, M., Harrison, P.A., Newbold, T., Gregory, R.D. & Mace, G.M. (2020). A  
350 biodiversity target based on species extinctions. *Science (80-. )*, 368, 1193–1195.
- 351 Secretariat of the Convention on Biological Diversity. (2020a). *Global Biodiversity Outlook 5*. Montreal.
- 352 Secretariat of the Convention on Biological Diversity. (2020b). Update of the zero draft of the post-  
353 2020 Global Biodiversity Framework [WWW Document]. *CBD/POST2020/PREP/2/1 17 August*  
354 *2020*. URL [https://www.cbd.int/doc/c/3064/749a/0f65ac7f9def86707f4eaefa/post2020-prep-  
355 02-01-en.pdf](https://www.cbd.int/doc/c/3064/749a/0f65ac7f9def86707f4eaefa/post2020-prep-02-01-en.pdf)
- 356 Secretariat of the Convention on Biological Diversity. (2020c). Proposed indicators and monitoring  
357 approach for the post-2020 Global Biodiversity Framework [WWW Document].

- 358            *CBD/SBSTTA/24/3Add.1*. URL  
359            <https://www.cbd.int/doc/c/ddf4/06ce/f004afa32d48740b6c21ab98/sbstta-24-03-add1-en.pdf>
- 360    Secretariat of the Convention on Biological Diversity. (2021a). Scientific and technical information to  
361            support the review of the proposed goals and targets in the updated zero draft of the post-2020  
362            Global Biodiversity Framework [WWW Document]. *CBD/SBSTTA/24/3/Add.2*. URL  
363            <https://www.cbd.int/doc/c/9139/8957/661e2d7c33e590d55fdeae2f/sbstta-24-03-add2-en.pdf>
- 364    Secretariat of the Convention on Biological Diversity. (2021b). Indicators for the post-2020 Global  
365            Biodiversity Framework [WWW Document]. *CBD/SBSTTA/24/INF/16*. URL  
366            <https://www.cbd.int/doc/c/a6d3/3108/88518eab9c9d12b1c418398d/sbstta-24-inf-16-en.pdf>
- 367    ter Steege, H., Pitman, N.C.A., Killeen, T.J., Laurance, W.F., Peres, C.A., Guevara, J.E., ... Gamarra, L.V.  
368            (2015). Estimating the global conservation status of more than 15,000 Amazonian tree species.  
369            *Sci. Adv.*, 1, e1500936.
- 370    Williams, B.A., Watson, J.E.M., Butchart, S.H.M., Ward, M., Brooks, T.M., Butt, N., ... Simmonds, J.S.  
371            (2020). A robust goal is needed for species in the Post-2020 Global Biodiversity Framework.  
372            *Conserv. Lett.*, 2020, e12778.

373

#### 374    **Acknowledgments**

375    This paper is part of the work of the IUCN Species Survival Commission's Phylogenetic Diversity Task  
376    Force ([www.pdtf.org](http://www.pdtf.org)), a global and diverse group providing guidance on the inclusion of phylogenetic  
377    diversity in conservation. We thank On the EDGE Conservation for hosting and supporting our work.  
378    The views here do not necessarily reflect those of IUCN.

#### 379    **Author's contributions**

380    All authors conceived the idea and analyses. RG conducted all analyses and generated all figures with  
381    input from all authors. RG and NRO led the writing of the manuscript with input on drafts from all  
382    authors. All authors contributed to the preparation of the manuscript and approved the final version  
383    for submission.

#### 384    **Data accessibility statement**

385    Extinction risk data underpinning all analyses taken from Henriques et al. (2020) for historic  
386    assessments and IUCN Red List for 2020 mammal assessments and [www.birdlife.org](http://www.birdlife.org) for 2020 bird  
387    assessments. Underlying phylogenetic data for birds and mammals available from [www.vertlife.org](http://www.vertlife.org),  
388    and for cycads upon request from F. Forest.

#### 389    **Conflict of interest**

390    The authors declare no competing interests
